# Supplementary material for: Identification of a potential miRNA-mRNA regulatory network associated with the pathogenesis of cholestatic liver diseases
Source: Research Square preprint supplement (doi:10.21203/rs.3.rs-1400164/v1), 2022-03-07
Supplement: Supplementary file 1 [file 12e473f0b5ce98eeb25e4364.docx]

**Supplementary Table 1**Primers for reverse transcription and qPCR

| **miRNA** | **Primer sequence (from 5’ to 3’)** | | |
| --- | --- | --- | --- |
| **Reverse transcription** | **RT-qPCR** | |
| mmu-miR-122-5p | GTCGTATCCAGTGCAGGGTCCGAGGTATTCGCACTGGATACGACCAAACA | | F: CGCGTGGAGTGTGACAATGG |
| mmu-miR-30e-5p | GTCGTATCCAGTGCAGGGTCCGAGGTATTCGCACTGGATACGACCTTCCA | | F: GCGCGTGTAAACATCCTTGAC |
| mmu-miR-30e-3p | GTCGTATCCAGTGCAGGGTCCGAGGTATTCGCACTGGATACGACGCTGTA | | F: GCGCTTTCAGTCGGATGTT |
| mmu-let-7c-5p | GTCGTATCCAGTGCAGGGTCCGAGGTATTCGCACTGGATACGACAACCAT | | F: GCGCGTGAGGTAGTAGGTTGT |
| mmu-let-7c-1-3p | GTCGTATCCAGTGCAGGGTCCGAGGTATTCGCACTGGATACGACGGAAAG | | F: GCGCGCTGTACAACCTTCTAG |
| mmu-miR-107 | GTCGTATCCAGTGCAGGGTCCGAGGTATTCGCACTGGATACGACTGATAG | | F: GCGAGCAGCATTGTACAGGG |
| mmu-miR-503-5p | GTCGTATCCAGTGCAGGGTCCGAGGTATTCGCACTGGATACGACCTGCAG | | F: CGTAGCAGCGGGAACAGTT |
| mmu-miR-503-3p | GTCGTATCCAGTGCAGGGTCCGAGGTATTCGCACTGGATACGACCCTGGC | | F: CGGGGGTATTGTTTCCGCT |
| mmu-miR-192-5p | GTCGTATCCAGTGCAGGGTCCGAGGTATTCGCACTGGATACGACGGCTGT | | F: GCGCGCTGACCTATGAATTG |
| mmu-miR-192-3p | GTCGTATCCAGTGCAGGGTCCGAGGTATTCGCACTGGATACGACCTGTGA | | F: GCGCTGCCAATTCCATAGG |
| U6 | AACGCTTCACGAATTTGCGT | | F: CTCGCTTCGGCAGCACA  R: AACGCTTCACGAATTTGCGT |
